# Supplementary material for: Advancements in Roundness Measurement Parts for Industrial Automation Using Internet of Things Architecture-Based Computer Vision and Image Processing Techniques
Source: MDPI journal article supplement (doi:10.3390/app132011419), 2023-10-18
Supplement: s1 [file s1]

## Supplementary Materials

Open CV Code of the development 3SMVI

#!/\*\*\*\*\*

#Programming Start

#Prepared by Yazid Saif-2023

#Research title: Developing a Smart Vision Inspection System on  
STEP-NC Machine with IoT Environment.

#Universit Tun Hussein Onn Malaysia

\*\*\*\*\*/

Object Measurement.py

import cv2

import utlis

#####

webcam = True

path = '1.jpg'

cap = cv2.VideoCapture(0)

cap.set(10,160)

cap.set(3,1920)

cap.set(4,1080)

scale = 3

wP = 210 \*scale

hP= 297 \*scale

#####

while True:

if webcam:success,img = cap.read()

else: img = cv2.imread(path)

imgContours , conts = utlis.getContours(img,minArea=50000,filter=4)

if len(conts) != 0:

biggest = conts[0][2]

#print(biggest)

imgWarp = utlis.warpImg(img, biggest, wP,hP)

imgContours2, conts2 = utlis.getContours(imgWarp,

minArea=2000, filter=4,

cThr=[50,50],draw = False)

if len(conts) != 0:244

for obj in conts2:

cv2.polylines(imgContours2,[obj[2]],True,(0,255,0),2)

nPoints = utlis.reorder(obj[2])

nW = round((utlis.findDis(nPoints[0][0]//scale,nPoints[1][0]//scale)/10),1)

nH = round((utlis.findDis(nPoints[0][0]//scale,nPoints[2][0]//scale)/10),1)

cv2.arrowsLine(imgContours2, (nPoints[0][0][0], nPoints[0][0][1]),

(nPoints[1][0][0], nPoints[1][0][1]),

(255, 0, 255), 3, 8, 0, 0.05)

cv2.arrowsLine(imgContours2, (nPoints[0][0][0], nPoints[0][0][1]),

(nPoints[2][0][0], nPoints[2][0][1]),

(255, 0, 255), 3, 8, 0, 0.05)

x, y, w, h = obj[3]

```

cv2.putText(imgContours2, '{}cm'.format(nW), (x + 30, y - 10),
cv2.FONT_HERSHEY_COMPLEX_SMALL, 1.5,
(255, 0, 255), 2)
cv2.putText(imgContours2, '{}cm'.format(nH), (x - 70, y + h // 2),
cv2.FONT_HERSHEY_COMPLEX_SMALL, 1.5,
(255, 0, 255), 2)
cv2.imshow('A4', imgContours2)
img = cv2.resize(img,(0,0),None,0.5,0.5)
cv2.imshow('Original',img)
cv2.waitKey(1)
Utlis.py
import cv2
import numpy as np
def
getContours(img,cThr=[100,100],showCanny=False,minArea=1000,filter=0,draw =False):
imgGray = cv2.cvtColor(img,cv2.COLOR_BGR2GRAY)
imgBlur = cv2.GaussianBlur(imgGray,(5,5),1)
imgCanny = cv2.Canny(imgBlur,cThr[0],cThr[1])
kernel = np.ones((5,5))
imgDial = cv2.dilate(imgCanny,kernel,iterations=3)
imgThre = cv2.erode(imgDial,kernel,iterations=2)
if showCanny:cv2.imshow('Canny',imgThre)
contours,hierarchy =
cv2.findContours(imgThre,cv2.RETR_EXTERNAL,cv2.CHAIN_APPROX_SIMPLE)
finalCountours = []
for i in contours:
area = cv2.contourArea(i)
if area > minArea:
peri = cv2.arcLength(i,True)
approx = cv2.approxPolyDP(i,0.02*peri,True)
bbox = cv2.boundingRect(approx)
if filter > 0:
if len(approx) == filter:
finalCountours.append([len(approx),area,approx,bbox,i])
else:
finalCountours.append([len(approx),area,approx,bbox,i])
finalCountours = sorted(finalCountours,key = lambda x:x[1] ,reverse= True)
if draw:
for con in finalCountours:
cv2.drawContours(img,con[4],-1,(0,0,255),3)
return img, finalCountours
def reorder(myPoints):
#print(myPoints.shape)
myPointsNew = np.zeros_like(myPoints)245
myPoints = myPoints.reshape((4,2))
add = myPoints.sum(1)
myPointsNew[0] = myPoints[np.argmin(add)]
myPointsNew[3] = myPoints[np.argmax(add)]

```

```

diff = np.diff(myPoints,axis=1)
myPointsNew[1]= myPoints[np.argmin(diff)]
myPointsNew[2] = myPoints[np.argmax(diff)]
return myPointsNew
def warpImg (img,points,w,h,pad=20):
# print(points)
points =reorder(points)
pts1 = np.float32(points)
pts2 = np.float32([[0,0],[w,0],[0,h],[w,h]])
matrix = cv2.getPerspectiveTransform(pts1,pts2)
imgWarp = cv2.warpPerspective(img,matrix,(w,h))
imgWarp = imgWarp[pad:imgWarp.shape[0]-pad,pad:imgWarp.shape[1]-pad]
return imgWarp
def findDis(pts1,pts2):
return ((pts2[0]-pts1[0])**2 + (pts2[1]-pts1[1])**2)**0.5

```
